# Supplementary material for: Gene Expression Profiling of the Sciatic Nerve in Streptozotocin-Induced Diabetic Rats with Peripheral Neuropathy
Source: Hindawi journal article supplement (doi:10.1155/2020/5283284), 2020-05-20
Supplement: f1 [file 5283284.f1.pdf]

Supplemental Figure 1. Correlation plot of all samples

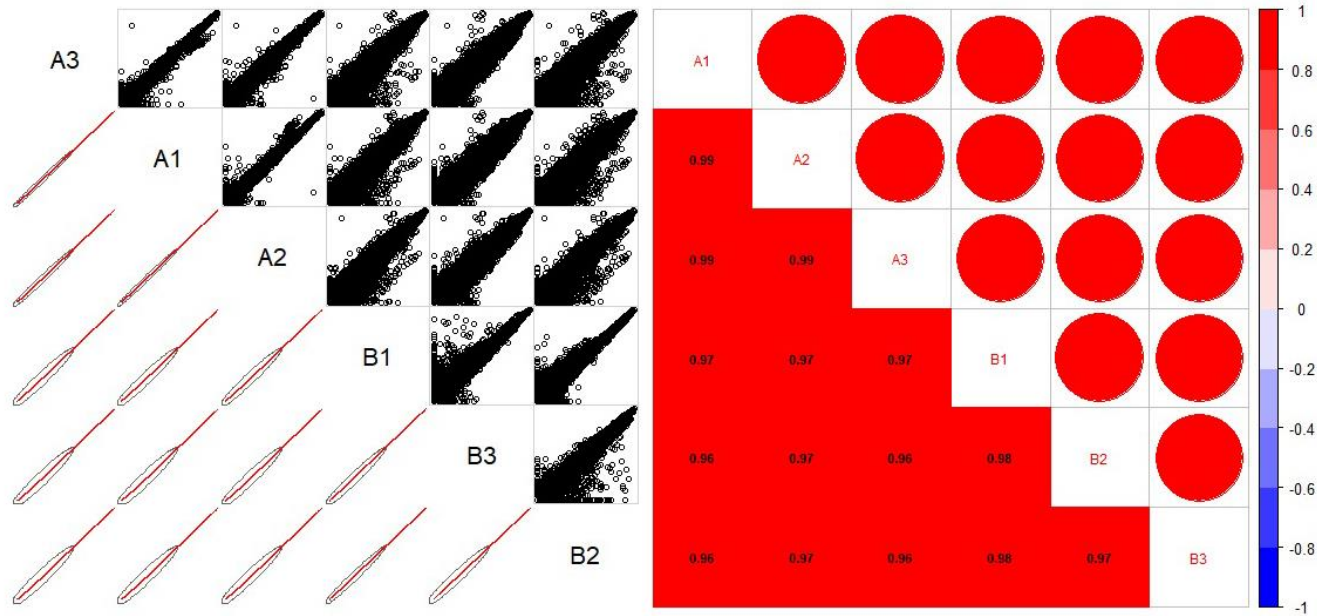

Pearson correlation analysis was used to assess the correlation between samples by using the R version 3.6.3. As shown, strong correlation was observed between samples within each group. Control group: A1, A2, A3; Experimental group: B1, B2, B3.

**Supplemental Table 1. Complete list of DEGs**

| No | GeneSymbol | GeneName                                                             | Regulation | Fold Change | P-value     | FDR         |
|----|------------|----------------------------------------------------------------------|------------|-------------|-------------|-------------|
| 1  | Ackr4      | atypical chemokine receptor 4                                        | up         | 5.0843429   | 0.000133522 | 0.007683641 |
| 2  | Adamts7    | ADAM metalloproteinase with thrombospondin type 1 motif, 7           | up         | 2.1156522   | 0.000358794 | 0.011629805 |
| 3  | Adcy6      | adenylate cyclase 6                                                  | up         | 2.5215176   | 0.000882382 | 0.016346704 |
| 4  | Adm        | adrenomedullin                                                       | up         | 2.0199275   | 0.000304358 | 0.010906744 |
| 5  | Aif1       | allograft inflammatory factor 1                                      | up         | 2.1460881   | 0.000771239 | 0.015531702 |
| 6  | Ambp       | alpha-1-microglobulin/bikunin precursor                              | up         | 7.6614017   | 9.78734E-05 | 0.007241839 |
| 7  | Ankrd61    | ankyrin repeat domain 61                                             | up         | 2.8720675   | 0.000375442 | 0.01180017  |
| 8  | Apoc1      | apolipoprotein C-I                                                   | up         | 3.1743974   | 0.000821751 | 0.015845565 |
| 9  | Arap3      | ArfGAP with RhoGAP domain, ankyrin repeat and PH domain 3            | up         | 2.0020368   | 0.000559187 | 0.013507393 |
| 10 | Asgr1      | asialoglycoprotein receptor 1                                        | up         | 2.8621012   | 1.54444E-05 | 0.00466337  |
| 11 | Aspm       | asp (abnormal spindle) homolog, microcephaly associated (Drosophila) | up         | 7.6160818   | 1.62496E-05 | 0.004777529 |
| 12 | Atp6v0d2   | ATPase, H <sup>+</sup> transporting, lysosomal V0 subunit D2         | up         | 11.4131066  | 0.000149364 | 0.007978581 |
| 13 | Bhlhe22    | basic helix-loop-helix family, member e22                            | up         | 3.2377621   | 8.7433E-05  | 0.007046482 |
| 14 | Btc        | betacellulin                                                         | up         | 4.2482255   | 0.000735917 | 0.015215081 |
| 15 | Bub1       | BUB1 mitotic checkpoint serine/threonine kinase                      | up         | 2.1070516   | 2.82717E-05 | 0.005308839 |
| 16 | Bub1b      | BUB1 mitotic checkpoint serine/threonine kinase B                    | up         | 4.6507896   | 0.000254881 | 0.010173655 |
| 17 | C3         | complement component 3                                               | up         | 18.6307292  | 0.000573282 | 0.013622858 |
| 18 | Cabp2      | calcium binding protein 2                                            | up         | 8.7741555   | 0.000481153 | 0.012907801 |
| 19 | Ccl3       | chemokine (C-C motif) ligand 3                                       | up         | 6.644307    | 0.000191162 | 0.009054145 |
| 20 | Ccl9       | chemokine (C-C motif) ligand 9                                       | up         | 10.1685251  | 0.000201293 | 0.009222338 |
| 21 | Ccnb1      | cyclin B1                                                            | up         | 2.9271814   | 0.000355346 | 0.011612855 |
| 22 | Ccnb2      | cyclin B2                                                            | up         | 2.6724712   | 0.000905556 | 0.016544451 |

|    |         |                                                        |    |            |             |             |
|----|---------|--------------------------------------------------------|----|------------|-------------|-------------|
| 23 | Ccnk    | cyclin K                                               | up | 2.0464518  | 0.000232391 | 0.009783319 |
| 24 | Cdh17   | cadherin 17                                            | up | 3.1705883  | 0.000391608 | 0.011991874 |
| 25 | Cdh6    | cadherin 6                                             | up | 2.769434   | 0.000526479 | 0.013161429 |
| 26 | Cdk1    | cyclin-dependent kinase 1                              | up | 5.5593146  | 0.000288002 | 0.010604886 |
| 27 | Cenpw   | centromere protein W                                   | up | 3.7302112  | 3.66704E-05 | 0.005674891 |
| 28 | Ckap2   | cytoskeleton associated protein 2                      | up | 4.8059775  | 0.000100773 | 0.007241839 |
| 29 | Cks2    | CDC28 protein kinase regulatory subunit 2              | up | 6.4357779  | 3.50508E-06 | 0.002904359 |
| 30 | Col22a1 | collagen, type XXII, alpha 1                           | up | 3.0485503  | 0.000424125 | 0.012307833 |
| 31 | Cp      | ceruloplasmin (ferroxidase)                            | up | 2.8619064  | 0.000123686 | 0.007515143 |
| 32 | Cramp11 | Crp, cramped-like (Drosophila)                         | up | 5.4185666  | 0.000486288 | 0.0129488   |
| 33 | Csrp2   | cysteine and glycine-rich protein 2                    | up | 2.9421219  | 0.000631849 | 0.014174351 |
| 34 | Cthrc1  | collagen triple helix repeat containing 1              | up | 11.6175805 | 0.000272348 | 0.010465194 |
| 35 | Cuedc2  | CUE domain containing 2                                | up | 6.0334478  | 4.9224E-05  | 0.006448421 |
| 36 | Cx3cr1  | chemokine (C-X3-C motif) receptor 1                    | up | 6.5982373  | 0.000194865 | 0.009138698 |
| 37 | Cxcl2   | chemokine (C-X-C motif) ligand 2                       | up | 21.2002053 | 4.2039E-05  | 0.005935051 |
| 38 | Cyfip2  | cytoplasmic FMR1 interacting protein 2                 | up | 3.5276141  | 0.000147337 | 0.007963063 |
| 39 | Cym     | chymosin                                               | up | 5.719453   | 6.62509E-05 | 0.00670157  |
| 40 | Cyp11b3 | cytochrome P450, family 11, subfamily b, polypeptide 3 | up | 2.6014446  | 0.000808511 | 0.015760882 |
| 41 | Cyp2b2  | cytochrome P450, family 2, subfamily b, polypeptide 2  | up | 2.0121323  | 0.000974396 | 0.01709426  |
| 42 | Cyp3a9  | cytochrome P450, family 3, subfamily a, polypeptide 9  | up | 4.576099   | 0.000710409 | 0.015063538 |
| 43 | Cyp4a2  | cytochrome P450, family 4, subfamily a, polypeptide 2  | up | 5.3994823  | 0.000559639 | 0.013507393 |
| 44 | Cyp4f4  | cytochrome P450, family 4, subfamily f, polypeptide 4  | up | 5.3582868  | 8.06873E-05 | 0.006840908 |
| 45 | Def8    | differentially expressed in FDCP 8 homolog (mouse)     | up | 2.8698254  | 0.000767397 | 0.015519914 |
| 46 | Dio3    | deiodinase, iodothyronine, type III                    | up | 8.8632469  | 0.000187051 | 0.008984465 |

---

|    |         |                                                              |    |            |             |             |
|----|---------|--------------------------------------------------------------|----|------------|-------------|-------------|
| 47 | Dlk1    | delta-like 1 homolog (Drosophila)                            | up | 3.5013557  | 0.000498598 | 0.01302951  |
| 48 | Dok3    | docking protein 3                                            | up | 2.2211415  | 0.000268554 | 0.01043723  |
| 49 | Dscc1   | DNA replication and sister chromatid cohesion 1              | up | 2.2196389  | 0.00037032  | 0.011738559 |
| 50 | Dsn1    | DSN1, MIS12 kinetochore complex component                    | up | 3.0346012  | 0.000721044 | 0.01509698  |
| 51 | Dusp16  | dual specificity phosphatase 16                              | up | 3.2741944  | 8.6069E-05  | 0.007022284 |
| 52 | Dusp6   | dual specificity phosphatase 6                               | up | 2.0393296  | 0.000628578 | 0.014171193 |
| 53 | E2f8    | E2F transcription factor 8                                   | up | 5.7601924  | 0.00047249  | 0.012820741 |
| 54 | Eltd1   | EGF, latrophilin and seven transmembrane domain containing 1 | up | 11.0187281 | 0.000247653 | 0.010023805 |
| 55 | Epcam   | epithelial cell adhesion molecule                            | up | 8.6290815  | 0.000217356 | 0.009349496 |
| 56 | Ephb3   | Eph receptor B3                                              | up | 4.0929371  | 0.000208955 | 0.009348917 |
| 57 | Extl3   | exostosin-like glycosyltransferase 3                         | up | 5.9688638  | 5.42632E-05 | 0.00647751  |
| 58 | Fam131b | family with sequence similarity 131, member B                | up | 3.3731404  | 0.000799793 | 0.015687767 |
| 59 | Fam19a5 | family with sequence similarity 19, member A5                | up | 4.2108627  | 1.25434E-05 | 0.00466337  |
| 60 | Fam72a  | family with sequence similarity 72, member A                 | up | 2.0514356  | 0.000259732 | 0.01024481  |
| 61 | Fam78b  | family with sequence similarity 78, member B                 | up | 3.0026905  | 9.74215E-05 | 0.007241839 |
| 62 | Folr4   | folate receptor 4 (delta)                                    | up | 2.9642286  | 0.000284212 | 0.01057462  |
| 63 | Foxm1   | forkhead box M1                                              | up | 2.5603099  | 4.16682E-07 | 0.00192102  |
| 64 | Fzd8    | frizzled family receptor 8                                   | up | 2.3512382  | 0.000164753 | 0.008441015 |
| 65 | Gamt    | guanidinoacetate N-methyltransferase                         | up | 2.2346708  | 8.26469E-05 | 0.006885665 |
| 66 | Gins1   | GINS complex subunit 1 (Psf1 homolog)                        | up | 2.6688607  | 0.00022338  | 0.009537291 |
| 67 | Gira2   | glycine receptor, alpha 2                                    | up | 4.6188595  | 3.64476E-05 | 0.005674891 |
| 68 | Golm1   | golgi membrane protein 1                                     | up | 3.8256786  | 0.000759299 | 0.015454568 |
| 69 | Gpr68   | G protein-coupled receptor 68                                | up | 2.0378888  | 0.000853308 | 0.01612149  |
| 70 | Grk4    | G protein-coupled receptor kinase 4                          | up | 2.4655822  | 4.18497E-06 | 0.002904676 |

|    |              |                                                             |    |           |             |             |
|----|--------------|-------------------------------------------------------------|----|-----------|-------------|-------------|
| 71 | Gsg1         | germ cell associated 1                                      | up | 2.6719996 | 0.000207974 | 0.00934862  |
| 72 | Hmgb2        | high mobility group box 2                                   | up | 2.763117  | 0.000152817 | 0.008090446 |
| 73 | Homer1       | homer homolog 1 (Drosophila)                                | up | 2.8834054 | 5.34955E-05 | 0.00647751  |
| 74 | Hoxc5        | homeo box C5                                                | up | 4.6054597 | 0.000610372 | 0.014090613 |
| 75 | Iglon5       | IgLON family member 5                                       | up | 5.1081263 | 0.000428427 | 0.012356966 |
| 76 | Igsf8        | immunoglobulin superfamily, member 8                        | up | 2.1705039 | 0.000393181 | 0.01200442  |
| 77 | Il1rn        | interleukin 1 receptor antagonist                           | up | 4.8148083 | 0.000144874 | 0.007937271 |
| 78 | Ipo13        | importin 13                                                 | up | 2.7855597 | 0.000237111 | 0.00979265  |
| 79 | Itih2        | inter-alpha-trypsin inhibitor heavy chain 2                 | up | 4.6421937 | 0.000785083 | 0.015628271 |
| 80 | Kcng3        | potassium voltage-gated channel, subfamily G, member 3      | up | 2.801903  | 0.000496807 | 0.01302951  |
| 81 | Kif20a       | kinesin family member 20A                                   | up | 5.4021504 | 1.0661E-05  | 0.004553205 |
| 82 | Kif20b       | kinesin family member 20B                                   | up | 4.8143714 | 2.8679E-05  | 0.005308839 |
| 83 | Kif22        | kinesin family member 22                                    | up | 6.1414604 | 5.02188E-05 | 0.006448421 |
| 84 | Klhl2        | kelch-like family member 2                                  | up | 2.0789572 | 1.43548E-05 | 0.00466337  |
| 85 | Knstrn       | kinetochore-localized astrin/SPAG5 binding protein          | up | 5.9635933 | 0.000117922 | 0.00746415  |
| 86 | Kntc1        | kinetochore associated 1                                    | up | 4.1022398 | 0.000933476 | 0.016822342 |
| 87 | LOC100362981 | LRRGT00010-like                                             | up | 3.9284281 | 2.04639E-05 | 0.004994303 |
| 88 | LOC171161    | common salivary protein 1                                   | up | 7.7198212 | 2.24082E-05 | 0.005124869 |
| 89 | LOC303448    | similar to glyceraldehyde-3-phosphate dehydrogenase         | up | 2.3689804 | 0.000546005 | 0.013361708 |
| 90 | LOC307263    | similar to Glyceraldehyde-3-phosphate dehydrogenase (GAPDH) | up | 5.2732949 | 3.18943E-05 | 0.005527659 |
| 91 | LOC681185    | similar to centromere autoantigen H                         | up | 3.9442994 | 0.000395041 | 0.01200442  |
| 92 | LOC681325    | hypothetical protein LOC681325                              | up | 2.3717164 | 0.000764525 | 0.015499517 |
| 93 | LOC681382    | hypothetical protein LOC681382                              | up | 4.1164255 | 7.81293E-05 | 0.006768556 |
| 94 | LOC689665    | hypothetical protein LOC689665                              | up | 8.4802665 | 0.000791743 | 0.015666516 |

|     |           |                                                                           |    |            |             |             |
|-----|-----------|---------------------------------------------------------------------------|----|------------|-------------|-------------|
| 95  | LOC689757 | similar to osteoclast inhibitory lectin                                   | up | 2.2015169  | 0.000503528 | 0.013067581 |
| 96  | LOC690309 | similar to DNA methyltransferase 3B                                       | up | 7.2510031  | 0.000724815 | 0.015111056 |
| 97  | Lppr1     | lipid phosphate phosphatase-related protein type 1                        | up | 3.0442411  | 0.000571176 | 0.013607704 |
| 98  | Lrrc8e    | leucine rich repeat containing 8 family, member E                         | up | 3.7458071  | 0.000163017 | 0.008370077 |
| 99  | Mapk12    | mitogen-activated protein kinase 12                                       | up | 3.8669466  | 0.000277657 | 0.010480355 |
| 100 | Med12     | mediator complex subunit 12                                               | up | 2.5821963  | 5.36619E-05 | 0.00647751  |
| 101 | Melk      | maternal embryonic leucine zipper kinase                                  | up | 7.427877   | 1.99638E-06 | 0.002503247 |
| 102 | Mixl1     | Mix paired-like homeobox 1                                                | up | 3.6391435  | 3.40053E-05 | 0.005625991 |
| 103 | Mki67     | marker of proliferation Ki-67                                             | up | 9.0458679  | 8.27691E-06 | 0.004159438 |
| 104 | Mmp12     | matrix metalloproteinase 12                                               | up | 90.6725927 | 7.21572E-05 | 0.00670157  |
| 105 | Mmp9      | matrix metalloproteinase 9                                                | up | 5.3004768  | 0.000198658 | 0.009154403 |
| 106 | Mrap2     | melanocortin 2 receptor accessory protein 2                               | up | 10.8959068 | 0.000179661 | 0.008825267 |
| 107 | Msln      | mesothelin                                                                | up | 3.9256922  | 0.000439777 | 0.012450484 |
| 108 | Mtfp1     | mitochondrial fission process 1                                           | up | 6.683634   | 0.000770779 | 0.015531702 |
| 109 | Mycn      | v-myc avian myelocytomatosis viral oncogene neuroblastoma derived homolog | up | 3.3282792  | 0.000150455 | 0.008000998 |
| 110 | Ncapg     | non-SMC condensin I complex, subunit G                                    | up | 4.9967316  | 0.000207499 | 0.009345869 |
| 111 | Ncaph     | non-SMC condensin I complex, subunit H                                    | up | 4.4697916  | 0.000115624 | 0.00746415  |
| 112 | Ndc80     | NDC80 kinetochore complex component                                       | up | 4.588126   | 2.75138E-06 | 0.002731207 |
| 113 | Nefm      | neurofilament, medium polypeptide                                         | up | 9.7980705  | 0.000969696 | 0.017088539 |
| 114 | Neurog2   | neurogenin 2                                                              | up | 8.2784295  | 0.000373937 | 0.01176839  |
| 115 | Ninl      | ninein-like                                                               | up | 2.119698   | 0.000225128 | 0.009594723 |
| 116 | Notch1    | notch 1                                                                   | up | 12.4914611 | 0.000331851 | 0.011364368 |
| 117 | Nppc      | natriuretic peptide C                                                     | up | 2.0062557  | 0.000789655 | 0.015651207 |

---

|     |         |                                                              |    |           |             |             |
|-----|---------|--------------------------------------------------------------|----|-----------|-------------|-------------|
| 118 | Nuf2    | NUF2, NDC80 kinetochore complex component                    | up | 4.6083268 | 1.70471E-05 | 0.004893139 |
| 119 | Nusap1  | nucleolar and spindle associated protein 1                   | up | 3.4560773 | 3.99852E-05 | 0.005738602 |
| 120 | Olfml2a | olfactomedin-like 2A                                         | up | 2.3137464 | 2.77853E-05 | 0.005295663 |
| 121 | Olr379  | olfactory receptor 379                                       | up | 5.6012766 | 0.000591342 | 0.013879927 |
| 122 | Olr619  | olfactory receptor 619                                       | up | 5.3811119 | 0.000497818 | 0.01302951  |
| 123 | Olr804  | olfactory receptor 804                                       | up | 3.4904984 | 5.83951E-06 | 0.003567194 |
| 124 | Oprk1   | opioid receptor, kappa 1                                     | up | 2.6530312 | 0.000822075 | 0.015845565 |
| 125 | Pbk     | PDZ binding kinase                                           | up | 6.6070648 | 9.64838E-05 | 0.007241839 |
| 126 | Pcdh17  | protocadherin 17                                             | up | 3.5083167 | 1.4274E-06  | 0.002503247 |
| 127 | Pcdhb15 | protocadherin beta 15                                        | up | 2.2080359 | 0.000960251 | 0.017021594 |
| 128 | Pi4k2a  | phosphatidylinositol 4-kinase type 2 alpha                   | up | 2.0932176 | 0.000466981 | 0.012785364 |
| 129 | Plxnb3  | plexin B3                                                    | up | 2.9649637 | 8.05094E-05 | 0.006840908 |
| 130 | Prc1    | protein regulator of cytokinesis 1                           | up | 3.6954728 | 0.000103091 | 0.007271432 |
| 131 | Ptk7    | protein tyrosine kinase 7                                    | up | 2.0039808 | 0.000319263 | 0.011150098 |
| 132 | Ptprn2  | protein tyrosine phosphatase, receptor type, N polypeptide 2 | up | 4.0807005 | 5.08739E-05 | 0.006452293 |
| 133 | Ptprv   | protein tyrosine phosphatase, receptor type, V               | up | 2.1845885 | 0.000617502 | 0.014122807 |
| 134 | Pura    | purine rich element binding protein A                        | up | 2.7676228 | 0.000215041 | 0.009348917 |
| 135 | Pwp2    | PWP2 periodic tryptophan protein homolog (yeast)             | up | 6.8175104 | 0.000787321 | 0.015628271 |
| 136 | Rad51   | RAD51 recombinase                                            | up | 2.8660761 | 0.000991888 | 0.017261307 |
| 137 | Rassf2  | Ras association (RalGDS/AF-6) domain family member 2         | up | 5.050669  | 0.000124362 | 0.007515143 |
| 138 | Rbp1    | retinol binding protein 1, cellular                          | up | 3.3019425 | 7.07089E-05 | 0.00670157  |
| 139 | Rdh10   | retinol dehydrogenase 10 (all-trans)                         | up | 2.057703  | 0.000240294 | 0.009853295 |
| 140 | Reg3b   | regenerating islet-derived 3 beta                            | up | 2.4178831 | 0.000912953 | 0.016573841 |
| 141 | Rfc3    | replication factor C (activator 1) 3                         | up | 2.2992473 | 3.43127E-05 | 0.005634447 |

|     |            |                                                                                                   |    |            |             |             |
|-----|------------|---------------------------------------------------------------------------------------------------|----|------------|-------------|-------------|
| 142 | RGD1306926 | similar to hypothetical protein FLJ22175                                                          | up | 3.0230665  | 0.000329631 | 0.011332084 |
| 143 | RGD1561327 | similar to melanoma antigen family A, 10                                                          | up | 2.7137372  | 0.000211868 | 0.009348917 |
| 144 | Rgs1       | regulator of G-protein signaling 1                                                                | up | 8.2964179  | 0.000497387 | 0.01302951  |
| 145 | Rgs12      | regulator of G-protein signaling 12                                                               | up | 2.4261231  | 9.76605E-05 | 0.007241839 |
| 146 | Ripk3      | receptor-interacting serine-threonine kinase 3                                                    | up | 2.7737126  | 0.00023544  | 0.00979265  |
| 147 | Rrm2       | ribonucleotide reductase M2                                                                       | up | 3.848191   | 0.000357538 | 0.011629805 |
| 148 | RT1-M4     | RT1 class Ib, locus M4                                                                            | up | 7.330075   | 0.000885294 | 0.016375196 |
| 149 | Rwdd2a     | RWD domain containing 2A                                                                          | up | 2.1602024  | 0.000422461 | 0.012307833 |
| 150 | Sapcd1     | suppressor APC domain containing 1                                                                | up | 2.3701891  | 0.000189974 | 0.009029968 |
| 151 | Sapcd2     | suppressor APC domain containing 2                                                                | up | 3.7907091  | 0.000908677 | 0.016557331 |
| 152 | Sbsn       | suprabasin                                                                                        | up | 6.2000161  | 0.000111644 | 0.00746415  |
| 153 | Scn3b      | sodium channel, voltage-gated, type III, beta                                                     | up | 11.9309623 | 0.000797386 | 0.015687767 |
| 154 | Sh3gl3     | SH3-domain GRB2-like 3                                                                            | up | 3.1572519  | 0.000635147 | 0.014202512 |
| 155 | Slc39a6    | solute carrier family 39 (zinc transporter), member 6                                             | up | 2.2307111  | 1.50542E-05 | 0.00466337  |
| 156 | Slfn13     | schlafen family member 13                                                                         | up | 3.3079642  | 4.58764E-05 | 0.006161164 |
| 157 | Smarcc1    | SWI/SNF related, matrix associated, actin dependent regulator of chromatin, subfamily c, member 1 | up | 2.0727017  | 0.000691235 | 0.014822656 |
| 158 | Smyd5      | SMYD family member 5                                                                              | up | 4.3140036  | 0.000136051 | 0.007760843 |
| 159 | Socs5      | suppressor of cytokine signaling 5                                                                | up | 2.067298   | 9.20766E-05 | 0.007210707 |
| 160 | Sox4       | SRY (sex determining region Y)-box 4                                                              | up | 4.7676566  | 0.000291858 | 0.010687427 |
| 161 | Sox5       | SRY (sex determining region Y)-box 5                                                              | up | 3.1288113  | 0.000144926 | 0.007937271 |
| 162 | Spag5      | sperm associated antigen 5                                                                        | up | 2.7608631  | 2.3255E-07  | 0.001846755 |
| 163 | Spc24      | SPC24, NDC80 kinetochore complex component                                                        | up | 2.8607297  | 1.37855E-05 | 0.00466337  |
| 164 | Spdl1      | spindle apparatus coiled-coil protein 1                                                           | up | 2.3366765  | 8.00894E-05 | 0.006840408 |



|     |           |                                                        |      |            |             |             |
|-----|-----------|--------------------------------------------------------|------|------------|-------------|-------------|
| 165 | Spdya     | speedy/RINGO cell cycle regulator family member A      | up   | 2.5987002  | 5.00965E-05 | 0.006448421 |
| 166 | Spic      | Spi-C transcription factor (Spi-1/PU.1 related)        | up   | 2.2296186  | 0.000136623 | 0.007763771 |
| 167 | Stampb    | Stam binding protein                                   | up   | 3.8261515  | 0.000333784 | 0.011364368 |
| 168 | Strc      | stereocilin                                            | up   | 2.0027939  | 0.00096608  | 0.017086781 |
| 169 | Tagln3    | transgelin 3                                           | up   | 12.7660108 | 0.000496414 | 0.01302951  |
| 170 | Tead2     | TEA domain family member 2                             | up   | 3.08482    | 0.000507362 | 0.013089751 |
| 171 | Tk1       | thymidine kinase 1, soluble                            | up   | 5.0644253  | 1.2181E-05  | 0.00466337  |
| 172 | Tmem202   | transmembrane protein 202                              | up   | 3.4645481  | 0.000563886 | 0.013543191 |
| 173 | Tmem47    | transmembrane protein 47                               | up   | 5.2241573  | 7.24388E-05 | 0.00670157  |
| 174 | Tmem88    | transmembrane protein 88                               | up   | 2.0456826  | 5.79082E-05 | 0.006550663 |
| 175 | Tmsb11    | thymosin beta-like protein 1                           | up   | 5.505763   | 0.000147402 | 0.007963063 |
| 176 | Tnfrsf12a | tumor necrosis factor receptor superfamily, member 12a | up   | 5.6286666  | 1.35508E-05 | 0.00466337  |
| 177 | Tnn       | tenascin N                                             | up   | 2.5117894  | 0.000857636 | 0.016154409 |
| 178 | Tnnt1     | troponin T type 1 (skeletal, slow)                     | up   | 2.9308066  | 0.000325813 | 0.011258322 |
| 179 | Tspan11   | tetraspanin 11                                         | up   | 2.7235789  | 0.000154638 | 0.008118338 |
| 180 | Ttk       | Ttk protein kinase                                     | up   | 4.3313116  | 0.000767163 | 0.015519914 |
| 181 | Ube2o     | ubiquitin-conjugating enzyme E2O                       | up   | 7.2795592  | 0.000455653 | 0.012691886 |
| 182 | Ube2t     | ubiquitin-conjugating enzyme E2T (putative)            | up   | 8.722121   | 0.000471054 | 0.012820741 |
| 183 | Ucn2      | urocortin 2                                            | up   | 44.2013083 | 0.000198004 | 0.009154403 |
| 184 | Vwa5b1    | von Willebrand factor A domain containing 5B1          | up   | 2.2513069  | 0.00047088  | 0.012820741 |
| 185 | Vwce      | von Willebrand factor C and EGF domains                | up   | 4.8589755  | 0.000980531 | 0.017163973 |
| 186 | Wdr38     | WD repeat domain 38                                    | up   | 3.2674311  | 0.000564489 | 0.013543191 |
| 1   | Aacs      | acetoacetyl-CoA synthetase                             | down | 4.5079324  | 0.000325895 | 0.011258322 |
| 2   | Aadat     | aminoadipate aminotransferase                          | down | 4.2378257  | 0.000525645 | 0.013154365 |

---

|    |          |                                                                 |      |           |             |             |
|----|----------|-----------------------------------------------------------------|------|-----------|-------------|-------------|
| 3  | Abcd2    | ATP-binding cassette, subfamily D (ALD), member 2               | down | 5.9946387 | 0.00015959  | 0.00828339  |
| 4  | Abhd5    | abhydrolase domain containing 5                                 | down | 3.7859046 | 0.000118092 | 0.00746415  |
| 5  | Abhd6    | abhydrolase domain containing 6                                 | down | 2.0092335 | 0.000590984 | 0.013879927 |
| 6  | Acat2    | acetyl-CoA acetyltransferase 2                                  | down | 2.4509414 | 0.000524864 | 0.013154365 |
| 7  | Acsl1    | acyl-CoA synthetase long-chain family member 1                  | down | 5.7869279 | 2.25844E-06 | 0.002562152 |
| 8  | Acss2    | acyl-CoA synthetase short-chain family member 2                 | down | 2.6406979 | 1.82485E-06 | 0.002503247 |
| 9  | Acta2    | actin, alpha 2, smooth muscle, aorta                            | down | 2.2345668 | 4.99052E-05 | 0.006448421 |
| 10 | Acvr1c   | activin A receptor, type IC                                     | down | 6.2263773 | 0.000701051 | 0.014965812 |
| 11 | Adamts13 | ADAMTS-like 3                                                   | down | 4.6504659 | 0.00064012  | 0.014249485 |
| 12 | Adarb1   | adenosine deaminase, RNA-specific, B1                           | down | 2.3401957 | 8.54878E-05 | 0.007016519 |
| 13 | Adipoq   | adiponectin, C1Q and collagen domain containing                 | down | 3.4768898 | 0.000710058 | 0.015063538 |
| 14 | Adk      | adenosine kinase                                                | down | 2.1079441 | 0.000334474 | 0.011364368 |
| 15 | Adrb3    | adrenoceptor beta 3                                             | down | 4.6306452 | 6.591E-05   | 0.00670157  |
| 16 | Agmo     | alkylglycerol monooxygenase                                     | down | 4.9929099 | 0.000388129 | 0.011915947 |
| 17 | Agpat2   | 1-acylglycerol-3-phosphate O-acyltransferase 2                  | down | 2.8790953 | 3.8661E-05  | 0.005720871 |
| 18 | Agpat3   | 1-acylglycerol-3-phosphate O-acyltransferase 3                  | down | 3.1323223 | 0.000118893 | 0.00746415  |
| 19 | Agpat9   | 1-acylglycerol-3-phosphate O-acyltransferase 9                  | down | 3.7168219 | 9.22716E-05 | 0.007210707 |
| 20 | Agt      | angiotensinogen (serpin peptidase inhibitor, clade A, member 8) | down | 4.3480961 | 9.3221E-05  | 0.007210707 |
| 21 | Ahrr     | aryl-hydrocarbon receptor repressor                             | down | 3.139942  | 0.000315982 | 0.011106777 |
| 22 | Ajuba    | ajuba LIM protein                                               | down | 2.1511577 | 0.000123843 | 0.007515143 |
| 23 | Akap12   | A kinase (PRKA) anchor protein 12                               | down | 3.2712621 | 0.000583503 | 0.013777382 |
| 24 | Akr1b1   | aldo-keto reductase family 1, member B1 (aldose reductase)      | down | 4.9428302 | 0.000130497 | 0.00762445  |
| 25 | Akr1c14  | aldo-keto reductase family 1, member C14                        | down | 3.2829364 | 0.000440509 | 0.012450484 |
| 26 | Alg6     | ALG6, alpha-1,3-glucosyltransferase                             | down | 4.8679819 | 0.000336716 | 0.011378599 |

---

|    |          |                                                              |      |           |             |             |
|----|----------|--------------------------------------------------------------|------|-----------|-------------|-------------|
| 27 | Amigo2   | adhesion molecule with Ig like domain 2                      | down | 2.7881303 | 1.34812E-05 | 0.00466337  |
| 28 | Aoc3     | amine oxidase, copper containing 3                           | down | 3.0906087 | 0.000113526 | 0.00746415  |
| 29 | Aplp2    | amyloid beta (A4) precursor-like protein 2                   | down | 2.9400489 | 0.00021086  | 0.009348917 |
| 30 | Ar       | androgen receptor                                            | down | 3.0314791 | 0.00025418  | 0.010173655 |
| 31 | Armc1    | armadillo repeat containing 1                                | down | 2.0487496 | 0.000500979 | 0.01302951  |
| 32 | Atp2a3   | ATPase, Ca++ transporting, ubiquitous                        | down | 3.1882218 | 0.000326887 | 0.01127026  |
| 33 | Atp6v0e1 | ATPase, H+ transporting, lysosomal, V0 subunit e1            | down | 2.1282842 | 0.000118331 | 0.00746415  |
| 34 | Atp9b    | ATPase, class II, type 9B                                    | down | 2.1752241 | 0.000306956 | 0.010914799 |
| 35 | Bche     | butyrylcholinesterase                                        | down | 2.4679456 | 0.000284584 | 0.01057462  |
| 36 | Cacna1c  | calcium channel, voltage-dependent, L type, alpha 1C subunit | down | 3.0449591 | 0.000488535 | 0.012975321 |
| 37 | Cacnb3   | calcium channel, voltage-dependent, beta 3 subunit           | down | 3.4019965 | 0.000116025 | 0.00746415  |
| 38 | Cald1    | caldesmon 1                                                  | down | 2.2039913 | 9.68986E-05 | 0.007241839 |
| 39 | Caprin1  | cell cycle associated protein 1                              | down | 2.0651949 | 0.000706712 | 0.015032767 |
| 40 | Car13    | carbonic anhydrase 13                                        | down | 3.5644971 | 3.05673E-06 | 0.002800908 |
| 41 | Car3     | carbonic anhydrase 3                                         | down | 6.992138  | 0.000355874 | 0.011614159 |
| 42 | Cat      | catalase                                                     | down | 3.1842059 | 0.000339751 | 0.01143253  |
| 43 | Cav1     | caveolin 1, caveolae protein                                 | down | 2.8508497 | 0.000956709 | 0.016985085 |
| 44 | Cav2     | caveolin 2                                                   | down | 5.9095448 | 3.38001E-06 | 0.002904359 |
| 45 | Ccl19    | chemokine (C-C motif) ligand 19                              | down | 2.7296334 | 0.00062188  | 0.014137089 |
| 46 | Ccng2    | cyclin G2                                                    | down | 2.3102468 | 0.000243552 | 0.009919136 |
| 47 | Cd302    | CD302 molecule                                               | down | 2.2416971 | 7.48632E-05 | 0.006705041 |
| 48 | Cd36     | CD36 molecule (thrombospondin receptor)                      | down | 4.5947849 | 0.000715198 | 0.015078647 |
| 49 | Cd55     | Cd55 molecule                                                | down | 4.3231207 | 0.000177224 | 0.008777922 |
| 50 | Cd99l2   | CD99 molecule-like 2                                         | down | 4.4345478 | 2.27469E-05 | 0.005124869 |

---

|    |          |                                                         |      |           |             |             |
|----|----------|---------------------------------------------------------|------|-----------|-------------|-------------|
| 51 | Cdc40    | cell division cycle 40                                  | down | 2.5910433 | 0.000738274 | 0.015215081 |
| 52 | Cdc42bpa | CDC42 binding protein kinase alpha                      | down | 2.2791779 | 2.92882E-05 | 0.005367406 |
| 53 | Cdc42ep3 | CDC42 effector protein (Rho GTPase binding) 3           | down | 2.3318341 | 0.000373709 | 0.01176839  |
| 54 | Cdkl1    | cyclin-dependent kinase-like 1 (CDC2-related kinase)    | down | 2.5199517 | 0.00096803  | 0.017088539 |
| 55 | Cdo1     | cysteine dioxygenase type 1                             | down | 8.0907288 | 1.24249E-05 | 0.00466337  |
| 56 | Cdr2     | cerebellar degeneration-related 2                       | down | 2.1875856 | 0.000420985 | 0.012307833 |
| 57 | Cenpb    | centromere protein B                                    | down | 2.2369702 | 0.000629096 | 0.014171193 |
| 58 | Cep70    | centrosomal protein 70                                  | down | 2.4593807 | 4.24458E-05 | 0.00594841  |
| 59 | Cept1    | choline/ethanolamine phosphotransferase 1               | down | 2.7884456 | 0.00097115  | 0.017088539 |
| 60 | Cers2    | ceramide synthase 2                                     | down | 3.3979905 | 0.00092421  | 0.01670591  |
| 61 | Ces1d    | carboxylesterase 1D                                     | down | 4.1051976 | 0.000384092 | 0.011867124 |
| 62 | Cgref1   | cell growth regulator with EF hand domain 1             | down | 2.6732036 | 7.34848E-05 | 0.00670157  |
| 63 | Chchd2   | coiled-coil-helix-coiled-coil-helix domain containing 2 | down | 2.3240866 | 0.000785561 | 0.015628271 |
| 64 | Chga     | chromogranin A (parathyroid secretory protein 1)        | down | 5.2419388 | 0.000635273 | 0.014202512 |
| 65 | Chmp4c   | charged multivesicular body protein 4C                  | down | 2.3382006 | 0.00021113  | 0.009348917 |
| 66 | Chn1     | chimerin 1                                              | down | 3.5916589 | 0.000334373 | 0.011364368 |
| 67 | Cldn12   | claudin 12                                              | down | 2.4733632 | 9.61919E-06 | 0.004353374 |
| 68 | Cldn14   | claudin 14                                              | down | 2.2218254 | 7.42325E-05 | 0.00670157  |
| 69 | Cldn5    | claudin 5                                               | down | 3.7617483 | 0.000864597 | 0.016211264 |
| 70 | Cmtm6    | CKLF-like MARVEL transmembrane domain containing 6      | down | 2.6116909 | 2.87458E-05 | 0.005308839 |
| 71 | Cntf     | ciliary neurotrophic factor                             | down | 3.6039558 | 1.36393E-05 | 0.00466337  |
| 72 | Cobll1   | cordons-bleu WH2 repeat protein-like 1                  | down | 2.4479159 | 0.000128741 | 0.007610736 |
| 73 | Cog6     | component of oligomeric golgi complex 6                 | down | 2.1853229 | 7.29912E-05 | 0.00670157  |
| 74 | Col24a1  | collagen, type XXIV, alpha 1                            | down | 6.6325725 | 0.00069896  | 0.014947965 |

|    |            |                                                                                           |      |           |             |             |
|----|------------|-------------------------------------------------------------------------------------------|------|-----------|-------------|-------------|
| 75 | Col4a1     | collagen, type IV, alpha 1                                                                | down | 3.1234357 | 0.000235169 | 0.00979265  |
| 76 | Col4a2     | collagen, type IV, alpha 2                                                                | down | 2.7662683 | 7.34346E-05 | 0.00670157  |
| 77 | Col4a5     | collagen, type IV, alpha 5                                                                | down | 2.9703576 | 0.000214259 | 0.009348917 |
| 78 | Col9a2     | collagen, type IX, alpha 2                                                                | down | 7.7365951 | 0.000258332 | 0.010223424 |
| 79 | Crebl2     | cAMP responsive element binding protein-like 2                                            | down | 2.3361661 | 0.00015426  | 0.008118338 |
| 80 | Cryab      | crystallin, alpha B                                                                       | down | 2.7874572 | 1.74283E-06 | 0.002503247 |
| 81 | Csgalnact2 | chondroitin sulfate N-acetylgalactosaminyltransferase 2                                   | down | 5.826693  | 2.50604E-06 | 0.002595819 |
| 82 | Cst3       | cystatin C                                                                                | down | 2.2852944 | 0.000257265 | 0.010215136 |
| 83 | Ctdspl     | CTD (carboxy-terminal domain, RNA polymerase II, polypeptide A)<br>small phosphatase-like | down | 2.8313403 | 0.000219077 | 0.009387194 |
| 84 | Ctnna2     | catenin (cadherin associated protein), alpha 2                                            | down | 6.4777149 | 9.28149E-05 | 0.007210707 |
| 85 | Cyb561     | cytochrome b-561                                                                          | down | 4.0860244 | 3.53536E-06 | 0.002904359 |
| 86 | Cyp39a1    | cytochrome P450, family 39, subfamily a, polypeptide 1                                    | down | 2.2467358 | 0.000311499 | 0.011015257 |
| 87 | Cyp51      | cytochrome P450, family 51                                                                | down | 2.2527658 | 0.00068599  | 0.014776698 |
| 88 | Cyyr1      | cysteine/tyrosine-rich 1                                                                  | down | 2.3382772 | 5.64437E-07 | 0.00192102  |
| 89 | Dbh        | dopamine beta-hydroxylase (dopamine beta-monoxygenase)                                    | down | 8.0642036 | 2.25099E-06 | 0.002562152 |
| 90 | Dbnl       | drebrin-like                                                                              | down | 2.78943   | 0.000342639 | 0.011446095 |
| 91 | Ddah1      | dimethylarginine dimethylaminohydrolase 1                                                 | down | 4.7323431 | 0.000265678 | 0.010359283 |
| 92 | Dgat2      | diacylglycerol O-acyltransferase 2                                                        | down | 3.8871236 | 0.000630518 | 0.014171193 |
| 93 | Dgkb       | diacylglycerol kinase, beta                                                               | down | 2.0743906 | 0.0009416   | 0.016913293 |
| 94 | Dll1       | delta-like 1 (Drosophila)                                                                 | down | 4.6526438 | 2.07537E-05 | 0.004994303 |
| 95 | Dmbt1      | deleted in malignant brain tumors 1                                                       | down | 3.2916657 | 0.000669674 | 0.014582397 |
| 96 | Drp2       | dystrophin related protein 2                                                              | down | 4.7527368 | 0.000160601 | 0.008299697 |
| 97 | Dusp14     | dual specificity phosphatase 14                                                           | down | 3.4144961 | 6.75401E-06 | 0.003742034 |

---

|     |         |                                                      |      |           |             |             |
|-----|---------|------------------------------------------------------|------|-----------|-------------|-------------|
| 98  | Ebf3    | early B-cell factor 3                                | down | 2.9759244 | 0.000306924 | 0.010914799 |
| 99  | Echdc1  | enoyl CoA hydratase domain containing 1              | down | 2.5609402 | 0.00071513  | 0.015078647 |
| 100 | Echs1   | enoyl CoA hydratase, short chain, 1, mitochondrial   | down | 2.1662173 | 0.000233249 | 0.009783319 |
| 101 | Efhd1   | EF-hand domain family, member D1                     | down | 7.2909201 | 0.000607736 | 0.014056996 |
| 102 | Egfl7   | EGF-like-domain, multiple 7                          | down | 2.04654   | 6.20272E-05 | 0.006693911 |
| 103 | Ehbp1   | EH domain binding protein 1                          | down | 2.0267157 | 0.000369281 | 0.011738559 |
| 104 | Elmo2   | engulfment and cell motility 2                       | down | 2.6728583 | 2.26346E-05 | 0.005124869 |
| 105 | Elmod2  | ELMO/CED-12 domain containing 2                      | down | 2.7164718 | 0.000394304 | 0.01200442  |
| 106 | Elovl6  | ELOVL fatty acid elongase 6                          | down | 5.3907836 | 0.000182594 | 0.008844594 |
| 107 | Enc1    | ectodermal-neural cortex 1                           | down | 3.1111558 | 0.000721848 | 0.01509698  |
| 108 | Enoph1  | enolase-phosphatase 1                                | down | 2.1002082 | 0.000865544 | 0.016211264 |
| 109 | Enpep   | glutamyl aminopeptidase                              | down | 2.8945597 | 0.00018848  | 0.009017198 |
| 110 | Eps8    | epidermal growth factor receptor pathway substrate 8 | down | 2.1546934 | 0.000521993 | 0.013154365 |
| 111 | Eps8l2  | EPS8-like 2                                          | down | 2.4949014 | 0.000797951 | 0.015687767 |
| 112 | Ermn    | ermin, ERM-like protein                              | down | 2.3853019 | 0.000927216 | 0.016734836 |
| 113 | Esam    | endothelial cell adhesion molecule                   | down | 2.8264815 | 6.70455E-05 | 0.00670157  |
| 114 | Etnk1   | ethanolamine kinase 1                                | down | 2.1770765 | 0.000103228 | 0.007271432 |
| 115 | Fabp4   | fatty acid binding protein 4, adipocyte              | down | 4.1613934 | 0.000624494 | 0.014139906 |
| 116 | Faim3   | Fas apoptotic inhibitory molecule 3                  | down | 3.4809598 | 0.000104183 | 0.007278725 |
| 117 | Fam196a | family with sequence similarity 196, member A        | down | 2.7148278 | 0.000481802 | 0.012907801 |
| 118 | Fam213a | family with sequence similarity 213, member A        | down | 2.2551022 | 3.46546E-05 | 0.005634447 |
| 119 | Fam45a  | family with sequence similarity 45, member A         | down | 2.0209999 | 5.32758E-07 | 0.00192102  |
| 120 | Fam46c  | family with sequence similarity 46, member C         | down | 3.271465  | 0.000903818 | 0.016538073 |
| 121 | Fam57a  | family with sequence similarity 57, member A         | down | 2.7581177 | 0.00013774  | 0.007776097 |

|     |           |                                                                                         |      |           |             |             |
|-----|-----------|-----------------------------------------------------------------------------------------|------|-----------|-------------|-------------|
| 122 | Fam57b    | family with sequence similarity 57, member B                                            | down | 6.3423426 | 0.000269986 | 0.010442987 |
| 123 | Fam81a    | family with sequence similarity 81, member A                                            | down | 2.1586819 | 0.000849204 | 0.016082223 |
| 124 | Fat4      | FAT atypical cadherin 4                                                                 | down | 2.5511379 | 1.80112E-06 | 0.002503247 |
| 125 | Fcgrt     | Fc fragment of IgG, receptor, transporter, alpha                                        | down | 2.2342542 | 5.78506E-05 | 0.006550663 |
| 126 | Ffar4     | free fatty acid receptor 4                                                              | down | 6.8249818 | 0.00065771  | 0.014455049 |
| 127 | Fgfr1     | Fibroblast growth factor receptor 1                                                     | down | 3.0815823 | 0.000515294 | 0.013147662 |
| 128 | Fitm2     | fat storage-inducing transmembrane protein 2                                            | down | 2.4297496 | 0.000199948 | 0.009196053 |
| 129 | Fmo2      | flavin containing monooxygenase 2                                                       | down | 2.4678584 | 8.75486E-05 | 0.007046482 |
| 130 | Fpgt      | fucose-1-phosphate guanylyltransferase                                                  | down | 2.3548039 | 0.000284839 | 0.01057462  |
| 131 | Frpm1     | FERM and PDZ domain containing 1                                                        | down | 2.8886819 | 0.000567221 | 0.013554147 |
| 132 | Frrs11    | ferric-chelate reductase 1-like                                                         | down | 6.6114608 | 0.000253881 | 0.010173655 |
| 133 | Fzd4      | frizzled family receptor 4                                                              | down | 2.9846288 | 0.000215474 | 0.009348917 |
| 134 | Gabarap12 | GABA(A) receptor-associated protein like 2                                              | down | 2.0231522 | 0.000615365 | 0.014110167 |
| 135 | Galnt16   | UDP-N-acetyl-alpha-D-galactosamine:polypeptide N-acetylgalactosaminyltransferase 16     | down | 3.4577023 | 1.56663E-05 | 0.004665417 |
| 136 | Galnt15   | UDP-N-acetyl-alpha-D-galactosamine:polypeptide N-acetylgalactosaminyltransferase-like 5 | down | 5.553432  | 0.000364099 | 0.011643364 |
| 137 | Gas6      | growth arrest specific 6                                                                | down | 2.121799  | 0.000744456 | 0.01528934  |
| 138 | Gatsl3    | GATS protein-like 3                                                                     | down | 2.1574511 | 0.000919459 | 0.016657936 |
| 139 | Gca       | grancalcin                                                                              | down | 2.9106218 | 0.000126724 | 0.007554442 |
| 140 | Gcc2      | GRIP and coiled-coil domain containing 2                                                | down | 2.164161  | 7.71426E-05 | 0.006755632 |
| 141 | Gcnt2     | glucosaminyl (N-acetyl) transferase 2, I-branching enzyme                               | down | 2.1144911 | 0.00021094  | 0.009348917 |
| 142 | Gdf10     | growth differentiation factor 10                                                        | down | 3.5879381 | 0.000268992 | 0.01043723  |
| 143 | Ghr       | growth hormone receptor                                                                 | down | 4.4632427 | 9.30775E-05 | 0.007210707 |

---

|     |          |                                                                                         |      |           |             |             |
|-----|----------|-----------------------------------------------------------------------------------------|------|-----------|-------------|-------------|
| 144 | Gla      | galactosidase, alpha                                                                    | down | 2.3500786 | 7.31061E-06 | 0.003786262 |
| 145 | Glod4    | glyoxalase domain containing 4                                                          | down | 2.9307838 | 0.000119399 | 0.00746415  |
| 146 | Gls2     | glutaminase 2 (liver, mitochondrial)                                                    | down | 2.0276253 | 0.000556018 | 0.013475653 |
| 147 | Gm2a     | GM2 ganglioside activator                                                               | down | 2.0022663 | 0.000841395 | 0.016051692 |
| 148 | Gmcl1    | germ cell-less, spermatogenesis associated 1                                            | down | 2.1882356 | 0.000520818 | 0.013154365 |
| 149 | Gnai1    | guanine nucleotide binding protein (G protein), alpha inhibiting activity polypeptide 1 | down | 3.7879397 | 2.72122E-05 | 0.005228254 |
| 150 | Gpr116   | G protein-coupled receptor 116                                                          | down | 2.2030563 | 0.000621468 | 0.014137089 |
| 151 | Gpt      | glutamic-pyruvate transaminase (alanine aminotransferase)                               | down | 2.9950449 | 0.000950037 | 0.016985085 |
| 152 | Grem2    | gremlin 2                                                                               | down | 2.4842635 | 0.000271332 | 0.010442987 |
| 153 | Gria2    | glutamate receptor, ionotropic, AMPA 2                                                  | down | 4.6738    | 0.000331732 | 0.011364368 |
| 154 | Gucy1b3  | guanylate cyclase 1, soluble, beta 3                                                    | down | 2.4699686 | 0.000384546 | 0.011867124 |
| 155 | Hapln2   | hyaluronan and proteoglycan link protein 2                                              | down | 8.857771  | 9.86745E-06 | 0.004353374 |
| 156 | Has2     | hyaluronan synthase 2                                                                   | down | 3.3982566 | 0.000418571 | 0.012307833 |
| 157 | Hbegf    | heparin-binding EGF-like growth factor                                                  | down | 2.5436773 | 0.000147221 | 0.007963063 |
| 158 | Hhex     | hematopoietically expressed homeobox                                                    | down | 2.0584924 | 0.000172892 | 0.008653337 |
| 159 | Hiat1    | hippocampus abundant transcript 1                                                       | down | 2.7837696 | 0.000877689 | 0.016310498 |
| 160 | Hip1r    | huntingtin interacting protein 1 related                                                | down | 2.0189817 | 0.000760081 | 0.015454568 |
| 161 | Hist1h4b | histone cluster 1, H4b                                                                  | down | 7.3161289 | 5.94793E-05 | 0.006583067 |
| 162 | Hmgcr    | 3-hydroxy-3-methylglutaryl-CoA reductase                                                | down | 3.0812548 | 0.000676746 | 0.014683787 |
| 163 | Hrh1     | histamine receptor H 1                                                                  | down | 2.7487421 | 0.000214483 | 0.009348917 |
| 164 | Hsd17b12 | hydroxysteroid (17-beta) dehydrogenase 12                                               | down | 3.2899296 | 3.81121E-05 | 0.005674891 |
| 165 | Hsd17b7  | hydroxysteroid (17-beta) dehydrogenase 7                                                | down | 2.4218012 | 0.000973579 | 0.01709426  |
| 166 | Igfbp5   | insulin-like growth factor binding protein 5                                            | down | 3.2679627 | 1.37412E-05 | 0.00466337  |



---

|     |              |                                                                      |      |           |             |             |
|-----|--------------|----------------------------------------------------------------------|------|-----------|-------------|-------------|
| 167 | Igflr1       | IGF-like family receptor 1                                           | down | 5.3763569 | 0.000116267 | 0.00746415  |
| 168 | Il33         | interleukin 33                                                       | down | 3.6105756 | 0.000857653 | 0.016154409 |
| 169 | Inadl        | InaD-like (Drosophila)                                               | down | 2.6241655 | 0.000233222 | 0.009783319 |
| 170 | Ino80c       | INO80 complex subunit C                                              | down | 2.0889448 | 0.000142132 | 0.007889814 |
| 171 | Insig1       | insulin induced gene 1                                               | down | 5.5983639 | 0.000115835 | 0.00746415  |
| 172 | Iqgap2       | IQ motif containing GTPase activating protein 2                      | down | 2.9231401 | 5.47098E-05 | 0.00647751  |
| 173 | Itrp2        | inositol 1,4,5-trisphosphate receptor, type 2                        | down | 2.1369208 | 0.000520947 | 0.013154365 |
| 174 | Jag2         | jagged 2                                                             | down | 3.5969336 | 0.000883529 | 0.016355244 |
| 175 | Jam2         | junctional adhesion molecule 2                                       | down | 2.8680119 | 0.000198096 | 0.009154403 |
| 176 | Katnb1       | katanin p80 subunit B-like 1                                         | down | 3.2938436 | 0.000198251 | 0.009154403 |
| 177 | Kcnb1        | potassium voltage gated channel, Shab-related subfamily, member 1    | down | 3.7075667 | 3.64072E-05 | 0.005674891 |
| 178 | Kcnh2        | potassium voltage-gated channel, subfamily H (eag-related), member 2 | down | 4.9984231 | 0.000210425 | 0.009348917 |
| 179 | Kcnk3        | potassium channel, subfamily K, member 3                             | down | 2.8690219 | 0.000820481 | 0.015845565 |
| 180 | Kdr          | kinase insert domain receptor                                        | down | 2.2199697 | 0.000410136 | 0.012231263 |
| 181 | Klf11        | Kruppel-like factor 11                                               | down | 2.0712732 | 0.000225611 | 0.009597571 |
| 182 | Klf15        | Kruppel-like factor 15                                               | down | 2.0299877 | 0.00036301  | 0.011643364 |
| 183 | Kras         | Kirsten rat sarcoma viral oncogene                                   | down | 2.0725971 | 0.000625668 | 0.014139906 |
| 184 | Lifr         | leukemia inhibitory factor receptor alpha                            | down | 3.5235862 | 0.000847773 | 0.016082223 |
| 185 | Limch1       | LIM and calponin homology domains 1                                  | down | 3.2108463 | 3.93535E-05 | 0.005738602 |
| 186 | Lims2        | LIM and senescent cell antigen like domains 2                        | down | 2.6410422 | 2.04531E-05 | 0.004994303 |
| 187 | Llg1         | lethal giant larvae homolog 1 (Drosophila)                           | down | 2.038973  | 0.000857928 | 0.016154409 |
| 188 | LOC100365047 | scavenger receptor class B, member 2-like                            | down | 6.6524886 | 0.000198589 | 0.009154403 |
| 189 | LOC100909539 | uncharacterized LOC100909539                                         | down | 3.4735229 | 0.0007453   | 0.01528934  |
| 190 | LOC100910088 | prolow-density lipoprotein receptor-related protein 1-like           | down | 2.7783043 | 0.000456021 | 0.012691886 |

|     |              |                                                                     |      |            |             |             |
|-----|--------------|---------------------------------------------------------------------|------|------------|-------------|-------------|
| 191 | LOC100910823 | derlin-2-like                                                       | down | 2.4253514  | 0.000721996 | 0.01509698  |
| 192 | LOC100912608 | homeobox protein Hox-A10-like                                       | down | 2.285261   | 0.000840843 | 0.016051692 |
| 193 | LOC291863    | carboxylesterase-like                                               | down | 7.1389434  | 0.000852301 | 0.016115253 |
| 194 | LOC365829    | similar to grancalcin                                               | down | 3.3771688  | 9.78131E-05 | 0.007241839 |
| 195 | LOC501445    | derlin-1-like                                                       | down | 3.4863331  | 0.000442564 | 0.012477699 |
| 196 | LOC680225    | similar to Tubulin alpha-3 chain (Alpha-tubulin 3)                  | down | 2.1119419  | 0.000431123 | 0.012397184 |
| 197 | LOC685067    | similar to guanylate binding protein family, member 6               | down | 2.1116671  | 1.07026E-05 | 0.004553205 |
| 198 | LOC686911    | similar to Exocyst complex component 1                              | down | 2.3740386  | 6.52817E-05 | 0.00670157  |
| 199 | LOC688613    | hypothetical protein LOC688613                                      | down | 3.4652434  | 5.88416E-05 | 0.006550663 |
| 200 | Lox          | lysyl oxidase                                                       | down | 2.2614769  | 0.000757917 | 0.015454568 |
| 201 | Lpcat3       | lysophosphatidylcholine acyltransferase 3                           | down | 2.4323158  | 0.000254939 | 0.010173655 |
| 202 | Lpin1        | lipin 1                                                             | down | 2.5613416  | 0.000894909 | 0.016463564 |
| 203 | Lpl          | lipoprotein lipase                                                  | down | 8.3815477  | 0.000347273 | 0.011474934 |
| 204 | Lrch4        | leucine-rich repeats and calponin homology (CH) domain containing 4 | down | 2.7995407  | 0.00061536  | 0.014110167 |
| 205 | Lrg1         | leucine-rich alpha-2-glycoprotein 1                                 | down | 2.223327   | 0.000253097 | 0.010173655 |
| 206 | Lrp11        | low density lipoprotein receptor-related protein 11                 | down | 2.0000975  | 5.38123E-06 | 0.003373751 |
| 207 | Lrp2         | low density lipoprotein receptor-related protein 2                  | down | 7.8052204  | 8.77131E-06 | 0.004264648 |
| 208 | Lrrc16a      | leucine rich repeat containing 16A                                  | down | 2.2828985  | 0.000250276 | 0.010106045 |
| 209 | Lrrc58       | leucine rich repeat containing 58                                   | down | 3.4741329  | 0.000626159 | 0.014139906 |
| 210 | Lrrn1        | leucine rich repeat neuronal 1                                      | down | 10.9943385 | 0.000478479 | 0.012870073 |
| 211 | Ly6c         | Ly6-C antigen                                                       | down | 2.0637592  | 0.000291533 | 0.010687427 |
| 212 | Lypd6b       | LY6/PLAUR domain containing 6B                                      | down | 7.2419201  | 9.07579E-05 | 0.007183442 |
| 213 | Man2a1       | mannosidase, alpha, class 2A, member 1                              | down | 2.3304228  | 0.000870125 | 0.016255494 |
| 214 | Maoa         | monoamine oxidase A                                                 | down | 2.5457537  | 4.60329E-05 | 0.006161164 |

|     |          |                                                                        |      |           |             |             |
|-----|----------|------------------------------------------------------------------------|------|-----------|-------------|-------------|
| 215 | Maob     | monoamine oxidase B                                                    | down | 5.3023682 | 0.000278348 | 0.010480355 |
| 216 | Mapk3    | mitogen activated protein kinase 3                                     | down | 2.111467  | 0.000454563 | 0.012680917 |
| 217 | Mapk8ip1 | mitogen-activated protein kinase 8 interacting protein 1               | down | 3.1646033 | 0.000886981 | 0.016391746 |
| 218 | March2   | membrane-associated ring finger (C3HC4) 2, E3 ubiquitin protein ligase | down | 3.6965174 | 7.05014E-05 | 0.00670157  |
| 219 | Mboat1   | membrane bound O-acyltransferase domain containing 1                   | down | 2.3034642 | 1.45107E-05 | 0.00466337  |
| 220 | Mecom    | MDS1 and EVI1 complex locus                                            | down | 3.2757524 | 0.00065561  | 0.014435531 |
| 221 | Mgl1     | monoglyceride lipase                                                   | down | 3.5609236 | 0.000712668 | 0.01506438  |
| 222 | Mgst1    | microsomal glutathione S-transferase 1                                 | down | 3.1394995 | 0.000548493 | 0.013380302 |
| 223 | Mif4gd   | MIF4G domain containing                                                | down | 2.1939538 | 3.7359E-05  | 0.005674891 |
| 224 | Mmd      | monocyte to macrophage differentiation-associated                      | down | 4.7705926 | 0.000188489 | 0.009017198 |
| 225 | Mmp24    | matrix metalloproteinase 24                                            | down | 4.1656452 | 0.000527309 | 0.013168364 |
| 226 | Mrc1     | mannose receptor, C type 1                                             | down | 3.5097414 | 0.000501149 | 0.01302951  |
| 227 | Mrv1     | murine retrovirus integration site 1 homolog                           | down | 2.1086827 | 0.000316551 | 0.011106777 |
| 228 | Msmo1    | methylsterol monooxygenase 1                                           | down | 2.6805834 | 0.000874568 | 0.016303373 |
| 229 | Mst1     | Macrophage stimulating 1 (hepatocyte growth factor-like)               | down | 3.4892164 | 0.000784783 | 0.015628271 |
| 230 | Mt3      | metallothionein 3                                                      | down | 2.2809392 | 0.000273018 | 0.010474031 |
| 231 | Mtch2    | mitochondrial carrier 2                                                | down | 2.1036861 | 0.000602968 | 0.01403545  |
| 232 | Mturn    | maturin, neural progenitor differentiation regulator homolog (Xenopus) | down | 2.0280743 | 0.000287754 | 0.010604886 |
| 233 | Mvd      | mevalonate (diphospho) decarboxylase                                   | down | 2.254388  | 0.000178464 | 0.008802744 |
| 234 | Mylk     | myosin light chain kinase                                              | down | 2.9046423 | 7.18634E-05 | 0.00670157  |
| 235 | Nadk2    | NAD kinase 2, mitochondrial                                            | down | 2.0009683 | 2.29627E-05 | 0.005124869 |
| 236 | Nat8l    | N-acetyltransferase 8-like                                             | down | 3.0989039 | 0.000762577 | 0.015488185 |
| 237 | Nbl1     | neuroblastoma 1, DAN family BMP antagonist                             | down | 2.5106186 | 0.000939252 | 0.016900866 |
| 238 | Ncoa4    | nuclear receptor coactivator 4                                         | down | 3.6306034 | 0.000653645 | 0.014435531 |

|     |         |                                                                                                |      |           |             |             |
|-----|---------|------------------------------------------------------------------------------------------------|------|-----------|-------------|-------------|
| 239 | Ndfip2  | Nedd4 family interacting protein 2                                                             | down | 2.0658035 | 0.00079573  | 0.015687767 |
| 240 | Nedd4   | neural precursor cell expressed, developmentally down-regulated 4, E3 ubiquitin protein ligase | down | 2.1301829 | 1.28305E-05 | 0.00466337  |
| 241 | Nipa1   | non imprinted in Prader-Willi/Angelman syndrome 1                                              | down | 2.0777083 | 0.000294444 | 0.010713224 |
| 242 | Nnmt    | nicotinamide N-methyltransferase                                                               | down | 2.7230346 | 8.57038E-05 | 0.007016519 |
| 243 | Nova1   | neuro-oncological ventral antigen 1                                                            | down | 3.0778463 | 0.000295891 | 0.010713224 |
| 244 | Npw     | neuropeptide W                                                                                 | down | 6.1824097 | 4.73863E-06 | 0.003051168 |
| 245 | Npy     | neuropeptide Y                                                                                 | down | 2.5047038 | 0.000842963 | 0.01605335  |
| 246 | Npy1r   | neuropeptide Y receptor Y1                                                                     | down | 2.3876922 | 0.000238389 | 0.00979265  |
| 247 | Nqo1    | NAD(P)H dehydrogenase, quinone 1                                                               | down | 3.948015  | 9.43093E-06 | 0.004353374 |
| 248 | Nrtn    | neurturin                                                                                      | down | 3.0813823 | 0.000103102 | 0.007271432 |
| 249 | Nucb1   | nucleobindin 1                                                                                 | down | 3.0817321 | 0.000720386 | 0.01509698  |
| 250 | Nxt2    | nuclear transport factor 2-like export factor 2                                                | down | 3.9430402 | 6.35E-05    | 0.006693911 |
| 251 | Osbp11  | oxysterol binding protein-like 11                                                              | down | 2.0697794 | 0.000343998 | 0.011446095 |
| 252 | Pard6b  | par-6 family cell polarity regulator beta                                                      | down | 2.5545109 | 4.08004E-05 | 0.005820536 |
| 253 | Pc      | pyruvate carboxylase                                                                           | down | 3.1814825 | 0.000530352 | 0.013202816 |
| 254 | Pcsk6   | proprotein convertase subtilisin/kexin type 6                                                  | down | 4.3273926 | 5.13731E-05 | 0.006475725 |
| 255 | Pdcd4   | programmed cell death 4                                                                        | down | 2.9007655 | 2.45172E-05 | 0.005124869 |
| 256 | Pde2a   | phosphodiesterase 2A, cGMP-stimulated                                                          | down | 3.1347586 | 2.50622E-05 | 0.005140955 |
| 257 | Pemt    | phosphatidylethanolamine N-methyltransferase                                                   | down | 2.6677568 | 0.000257132 | 0.010215136 |
| 258 | Pex11a  | peroxisomal biogenesis factor 11 alpha                                                         | down | 2.6229101 | 1.90948E-06 | 0.002503247 |
| 259 | Pex19   | peroxisomal biogenesis factor 19                                                               | down | 2.124333  | 3.7763E-05  | 0.005674891 |
| 260 | Pgf     | placental growth factor                                                                        | down | 2.5178227 | 0.000215995 | 0.009348917 |
| 261 | Phf2011 | PHD finger protein 20-like 1                                                                   | down | 2.8578715 | 0.000996291 | 0.01727485  |

---

|     |         |                                                           |      |           |             |             |
|-----|---------|-----------------------------------------------------------|------|-----------|-------------|-------------|
| 262 | Phgdh   | phosphoglycerate dehydrogenase                            | down | 3.2935216 | 0.000226098 | 0.009597571 |
| 263 | Pi15    | peptidase inhibitor 15                                    | down | 2.3328284 | 9.61577E-05 | 0.007241839 |
| 264 | Pip4k2a | phosphatidylinositol-5-phosphate 4-kinase, type II, alpha | down | 2.3036736 | 0.000103181 | 0.007271432 |
| 265 | Pipox   | pipecolic acid oxidase                                    | down | 3.0332661 | 0.00080676  | 0.015741394 |
| 266 | Pkhd11l | polycystic kidney and hepatic disease 1-like 1            | down | 4.3111149 | 9.11914E-05 | 0.007193855 |
| 267 | Pla2g15 | phospholipase A2, group XV                                | down | 2.2653896 | 0.000546101 | 0.013361708 |
| 268 | Plcb1   | phospholipase C, beta 1 (phosphoinositide-specific)       | down | 2.8352822 | 6.66001E-05 | 0.00670157  |
| 269 | Plcl1   | phospholipase C-like 1                                    | down | 2.8925133 | 6.9823E-06  | 0.003780598 |
| 270 | Plscr4  | phospholipid scramblase 4                                 | down | 4.612056  | 0.000108162 | 0.007404739 |
| 271 | Plvap   | plasmalemma vesicle associated protein                    | down | 3.8728107 | 0.00061945  | 0.014122807 |
| 272 | Pmp2    | peripheral myelin protein 2                               | down | 6.8035466 | 1.87771E-05 | 0.004929144 |
| 273 | Pofut1  | protein O-fucosyltransferase 1                            | down | 2.1526441 | 0.000200791 | 0.009217036 |
| 274 | Pparg   | peroxisome proliferator-activated receptor gamma          | down | 4.2267135 | 0.000294954 | 0.010713224 |
| 275 | Ppp2r2b | protein phosphatase 2, regulatory subunit B, beta         | down | 3.6572261 | 5.28531E-05 | 0.00647751  |
| 276 | Ppp4r4  | protein phosphatase 4, regulatory subunit 4               | down | 3.9903024 | 0.000286292 | 0.01057462  |
| 277 | Prkar2b | protein kinase, cAMP dependent regulatory, type II beta   | down | 6.1213195 | 1.90836E-05 | 0.004941824 |
| 278 | Prkch   | protein kinase C, eta                                     | down | 2.3214588 | 7.56544E-05 | 0.006740076 |
| 279 | Prkci   | protein kinase C, iota                                    | down | 2.0716424 | 1.64438E-05 | 0.004777529 |
| 280 | Procr   | protein C receptor, endothelial                           | down | 2.9396317 | 0.000730237 | 0.015167533 |
| 281 | Prph    | peripherin                                                | down | 2.128174  | 0.00073603  | 0.015215081 |
| 282 | Psat1   | phosphoserine aminotransferase 1                          | down | 4.1437692 | 1.78909E-05 | 0.004899215 |
| 283 | Psmf1   | proteasome (prosome, macropain) inhibitor subunit 1       | down | 2.2712319 | 9.9053E-05  | 0.007241839 |
| 284 | Ptgds   | prostaglandin D2 synthase (brain)                         | down | 4.1464456 | 0.000489616 | 0.012989551 |
| 285 | Ptprd   | protein tyrosine phosphatase, receptor type, D            | down | 4.6572753 | 0.00034625  | 0.011457033 |

|     |            |                                                                                               |      |           |             |             |
|-----|------------|-----------------------------------------------------------------------------------------------|------|-----------|-------------|-------------|
| 286 | Ptprr      | protein tyrosine phosphatase, receptor type, R                                                | down | 2.5333877 | 0.000529939 | 0.013202816 |
| 287 | Pttglip    | pituitary tumor-transforming 1 interacting protein                                            | down | 2.5692789 | 0.000434005 | 0.012397184 |
| 288 | Pxdn       | peroxidasin homolog (Drosophila)                                                              | down | 2.0244229 | 0.000911126 | 0.016557331 |
| 289 | Rab11a     | RAB11a, member RAS oncogene family                                                            | down | 2.6502045 | 0.000787675 | 0.015628271 |
| 290 | Rab6b      | RAB6B, member RAS oncogene family                                                             | down | 2.1900958 | 0.000845648 | 0.016082223 |
| 291 | Rapgef5    | Rap guanine nucleotide exchange factor (GEF) 5                                                | down | 3.7676258 | 2.28667E-05 | 0.005124869 |
| 292 | Rarres1    | retinoic acid receptor responder (tazarotene induced) 1                                       | down | 2.8669088 | 0.00048645  | 0.0129488   |
| 293 | Rasip1     | Ras interacting protein 1                                                                     | down | 2.5473364 | 3.89483E-06 | 0.002904676 |
| 294 | Rb1        | retinoblastoma 1                                                                              | down | 2.2228337 | 0.000703263 | 0.01498617  |
| 295 | Rbm12b     | RNA binding motif protein 12B                                                                 | down | 4.3193742 | 6.08933E-05 | 0.006654692 |
| 296 | Rbp4       | retinol binding protein 4, plasma                                                             | down | 4.522627  | 6.06003E-06 | 0.003609351 |
| 297 | Rbpj       | recombination signal binding protein for immunoglobulin kappa J region                        | down | 2.027186  | 0.000243565 | 0.009919136 |
| 298 | Rbpms      | RNA binding protein with multiple splicing                                                    | down | 2.6120377 | 1.77957E-05 | 0.004899215 |
| 299 | Rcan2      | regulator of calcineurin 2                                                                    | down | 2.6414234 | 5.56442E-05 | 0.006513124 |
| 300 | Rcbtb2     | regulator of chromosome condensation (RCC1) and BTB (POZ) domain containing protein 2         | down | 2.0179984 | 0.000951241 | 0.016985085 |
| 301 | Rell2      | RELT-like 2                                                                                   | down | 2.6422109 | 0.00018181  | 0.008844594 |
| 302 | Ret        | ret proto-oncogene                                                                            | down | 5.0647737 | 1.76277E-05 | 0.004899215 |
| 303 | Rgcc       | regulator of cell cycle                                                                       | down | 2.0079282 | 0.000736085 | 0.015215081 |
| 304 | RGD1309594 | similar to RIKEN cDNA 1810043G02; DNA segment, Chr 10, Johns Hopkins University 13, expressed | down | 4.7496246 | 6.29302E-05 | 0.006693911 |
| 305 | RGD1309651 | similar to 1190005I06Rik protein                                                              | down | 3.454667  | 0.000305974 | 0.010914799 |
| 306 | RGD1310110 | similar to 3632451O06Rik protein                                                              | down | 3.5641404 | 0.000553866 | 0.013475653 |
| 307 | RGD1310769 | similar to HSPC288                                                                            | down | 5.1461911 | 0.000689886 | 0.014807062 |

---

|     |            |                                                                    |      |           |             |             |
|-----|------------|--------------------------------------------------------------------|------|-----------|-------------|-------------|
| 308 | RGD1359108 | similar to RIKEN cDNA 3110043O21                                   | down | 3.5515622 | 5.96853E-05 | 0.006583067 |
| 309 | RGD1562284 | similar to GlutaminyI-peptide cyclotransferase precursor (QC)      | down | 3.3732233 | 9.51084E-05 | 0.007241839 |
| 310 | RGD1564149 | similar to Protein C21orf58                                        | down | 4.1207381 | 0.000516183 | 0.013147662 |
| 311 | RGD1565355 | similar to fatty acid translocase/CD36                             | down | 4.4375524 | 0.000901223 | 0.016528669 |
| 312 | RGD621098  | similar to RIKEN cDNA D230025D16Rik                                | down | 2.9594033 | 4.21014E-05 | 0.005935051 |
| 313 | Rhbd11     | rhomboid, veinlet-like 1 (Drosophila)                              | down | 2.4123206 | 0.000119845 | 0.00746415  |
| 314 | Rhobtb3    | Rho-related BTB domain containing 3                                | down | 3.3776734 | 0.000993114 | 0.017270029 |
| 315 | Rhof       | ras homolog family member F (in filopodia)                         | down | 2.4232421 | 7.26988E-05 | 0.00670157  |
| 316 | Rin2       | Ras and Rab interactor 2                                           | down | 4.6707183 | 0.000343516 | 0.011446095 |
| 317 | Ripk2      | receptor-interacting serine-threonine kinase 2                     | down | 2.9862573 | 0.000332521 | 0.011364368 |
| 318 | Rmdn2      | regulator of microtubule dynamics 2                                | down | 2.9291945 | 0.000351604 | 0.011545168 |
| 319 | Rnf181     | ring finger protein 181                                            | down | 2.3989005 | 3.86714E-06 | 0.002904676 |
| 320 | Robo3      | roundabout, axon guidance receptor, homolog 3 (Drosophila)         | down | 4.4239379 | 8.38033E-06 | 0.004159438 |
| 321 | Rph3al     | rabphilin 3A-like (without C2 domains)                             | down | 2.1853174 | 0.000472079 | 0.012820741 |
| 322 | Rrn3       | RRN3 RNA polymerase I transcription factor homolog (S. cerevisiae) | down | 2.7202536 | 0.000518223 | 0.013148196 |
| 323 | S100b      | S100 calcium binding protein B                                     | down | 3.9797956 | 8.36022E-05 | 0.006939854 |
| 324 | S1pr1      | sphingosine-1-phosphate receptor 1                                 | down | 5.0849843 | 0.000238398 | 0.00979265  |
| 325 | Sc5d       | sterol-C5-desaturase                                               | down | 3.8791578 | 2.86834E-05 | 0.005308839 |
| 326 | Scnn1b     | sodium channel, non-voltage-gated 1, beta subunit                  | down | 2.4324703 | 0.000893332 | 0.016447241 |
| 327 | Sdccag3    | serologically defined colon cancer antigen 3                       | down | 2.0086947 | 0.000175629 | 0.008729824 |
| 328 | Selenbp1   | selenium binding protein 1                                         | down | 2.1171444 | 0.000956076 | 0.016985085 |
| 329 | Sepp1      | selenoprotein P, plasma, 1                                         | down | 2.8079385 | 0.000130573 | 0.00762445  |
| 330 | Sept8      | septin 8                                                           | down | 2.5461481 | 0.000406053 | 0.012153038 |
| 331 | Serf2      | small EDRK-rich factor 2                                           | down | 2.9250354 | 8.01072E-05 | 0.006840408 |

|     |          |                                                                                             |      |           |             |             |
|-----|----------|---------------------------------------------------------------------------------------------|------|-----------|-------------|-------------|
| 332 | Serinc1  | serine incorporator 1                                                                       | down | 3.148404  | 0.000235089 | 0.00979265  |
| 333 | Serp1    | stress-associated endoplasmic reticulum protein 1                                           | down | 2.2029662 | 1.501E-06   | 0.002503247 |
| 334 | Sft2d2   | SFT2 domain containing 2                                                                    | down | 2.8696937 | 0.000289852 | 0.010656526 |
| 335 | Sh3g12   | SH3-domain GRB2-like 2                                                                      | down | 2.5669153 | 5.48909E-05 | 0.00647751  |
| 336 | Shank3   | SH3 and multiple ankyrin repeat domains 3                                                   | down | 2.3314411 | 0.000259352 | 0.01024481  |
| 337 | She      | Src homology 2 domain containing E                                                          | down | 2.133307  | 0.000742615 | 0.015278109 |
| 338 | Shox2    | short stature homeobox 2                                                                    | down | 3.4830808 | 8.44753E-05 | 0.006963808 |
| 339 | Siah1a   | seven in absentia 1A                                                                        | down | 2.135433  | 0.000119032 | 0.00746415  |
| 340 | Slc15a2  | solute carrier family 15 (oligopeptide transporter), member 2                               | down | 3.9821679 | 3.36248E-05 | 0.005625991 |
| 341 | Slc1a3   | solute carrier family 1 (glial high affinity glutamate transporter), member 3               | down | 3.2367419 | 1.47068E-05 | 0.00466337  |
| 342 | Slc22a3  | solute carrier family 22 (organic cation transporter), member 3                             | down | 6.0665529 | 2.65099E-05 | 0.005176812 |
| 343 | Slc25a16 | solute carrier family 25 (mitochondrial carrier, Graves disease autoantigen), member 16     | down | 2.1511617 | 0.000120045 | 0.00746415  |
| 344 | Slc25a36 | solute carrier family 25 (pyrimidine nucleotide carrier ), member 36                        | down | 2.8078883 | 0.000433897 | 0.012397184 |
| 345 | Slc35a5  | solute carrier family 35, member A5                                                         | down | 3.2520912 | 0.000919046 | 0.016657936 |
| 346 | Slc38a10 | solute carrier family 38, member 10                                                         | down | 2.3431605 | 0.000472097 | 0.012820741 |
| 347 | Slc40a1  | solute carrier family 40 (iron-regulated transporter), member 1                             | down | 2.0534358 | 0.000657    | 0.014452796 |
| 348 | Slc43a3  | solute carrier family 43, member 3                                                          | down | 2.3079984 | 0.000311778 | 0.011015257 |
| 349 | Slc45a3  | solute carrier family 45, member 3                                                          | down | 2.7183073 | 1.25993E-05 | 0.00466337  |
| 350 | Slc7a10  | solute carrier family 7 (neutral amino acid transporter light chain, asc system), member 10 | down | 6.1193984 | 0.00066235  | 0.014503515 |
| 351 | Slco2b1  | solute carrier organic anion transporter family, member 2b1                                 | down | 2.061843  | 5.60439E-05 | 0.006513124 |
| 352 | Slfn5    | schlafen family member 5                                                                    | down | 3.1321323 | 6.19282E-05 | 0.006693911 |



|     |          |                                                                                                      |      |           |             |             |
|-----|----------|------------------------------------------------------------------------------------------------------|------|-----------|-------------|-------------|
| 353 | Smpd3    | sphingomyelin phosphodiesterase 3, neutral membrane                                                  | down | 2.3931808 | 0.000284294 | 0.01057462  |
| 354 | Snx13    | sorting nexin 13                                                                                     | down | 3.0781673 | 0.000522549 | 0.013154365 |
| 355 | Sod3     | superoxide dismutase 3, extracellular                                                                | down | 2.453857  | 0.000117406 | 0.00746415  |
| 356 | Sorl1    | sortilin-related receptor, LDLR class A repeats-containing                                           | down | 2.5368282 | 0.000492632 | 0.01302605  |
| 357 | Spns2    | spinster homolog 2                                                                                   | down | 2.6177751 | 6.79111E-05 | 0.00670157  |
| 358 | Spp12a   | signal peptide peptidase-like 2A                                                                     | down | 2.2566306 | 0.000605168 | 0.014056996 |
| 359 | Srd5a1   | steroid-5-alpha-reductase, alpha polypeptide 1 (3-oxo-5 alpha-steroid delta 4-dehydrogenase alpha 1) | down | 2.8698387 | 0.000509149 | 0.013099323 |
| 360 | Srgn     | serglycin                                                                                            | down | 2.4009422 | 5.22676E-05 | 0.00647751  |
| 361 | St13     | suppression of tumorigenicity 13                                                                     | down | 3.0279544 | 0.000561296 | 0.013507393 |
| 362 | Stard3nl | STARD3 N-terminal like                                                                               | down | 2.4802536 | 1.48588E-05 | 0.00466337  |
| 363 | Stard7   | StAR-related lipid transfer (START) domain containing 7                                              | down | 2.4946374 | 3.02462E-05 | 0.005434408 |
| 364 | Stc1     | stanniocalcin 1                                                                                      | down | 2.9573458 | 0.000266533 | 0.01037564  |
| 365 | Stx12    | syntaxin 12                                                                                          | down | 2.2796518 | 0.000500631 | 0.01302951  |
| 366 | Stx3     | syntaxin 3                                                                                           | down | 3.0087872 | 0.000325386 | 0.011258322 |
| 367 | Sulf1    | sulfatase 1                                                                                          | down | 2.5106693 | 0.000263988 | 0.010359283 |
| 368 | Sumf1    | sulfatase modifying factor 1                                                                         | down | 2.2969307 | 0.000809102 | 0.015760882 |
| 369 | Syngn3   | synaptogyrin 3                                                                                       | down | 3.8491408 | 4.25916E-07 | 0.00192102  |
| 370 | Tbc1d15  | TBC1 domain family, member 15                                                                        | down | 2.0256557 | 0.000379714 | 0.011867124 |
| 371 | Tc2n     | tandem C2 domains, nuclear                                                                           | down | 3.4606625 | 0.000265508 | 0.010359283 |
| 372 | Tcf25    | transcription factor 25 (basic helix-loop-helix)                                                     | down | 2.2569288 | 5.77224E-05 | 0.006550663 |
| 373 | Thbd     | thrombomodulin                                                                                       | down | 2.0362848 | 0.000317293 | 0.01111645  |
| 374 | Thrsp    | thyroid hormone responsive                                                                           | down | 5.1551366 | 0.00057318  | 0.013622858 |
| 375 | Timp4    | tissue inhibitor of metalloproteinase 4                                                              | down | 2.5512764 | 2.72054E-05 | 0.005228254 |

---

|     |           |                                                                        |      |           |             |             |
|-----|-----------|------------------------------------------------------------------------|------|-----------|-------------|-------------|
| 376 | Tm7sf2    | transmembrane 7 superfamily member 2                                   | down | 5.2754929 | 0.000258203 | 0.010223424 |
| 377 | Tmbim6    | transmembrane BAX inhibitor motif containing 6                         | down | 2.7704993 | 0.000943639 | 0.016918707 |
| 378 | Tmcc3     | transmembrane and coiled-coil domain family 3                          | down | 2.7603106 | 5.35629E-05 | 0.00647751  |
| 379 | Tmeff1    | transmembrane protein with EGF-like and two follistatin-like domains 1 | down | 4.415078  | 0.000648663 | 0.01437559  |
| 380 | Tmem252   | transmembrane protein 252                                              | down | 4.0388828 | 0.000655031 | 0.014435531 |
| 381 | Tmem62    | transmembrane protein 62                                               | down | 2.1360022 | 0.000217804 | 0.009349496 |
| 382 | Tnfrsf11b | tumor necrosis factor receptor superfamily, member 11b                 | down | 3.4964382 | 0.0001246   | 0.007515143 |
| 383 | Tpd52     | tumor protein D52                                                      | down | 2.1091201 | 0.000740066 | 0.01523884  |
| 384 | Trem3     | triggering receptor expressed on myeloid cells 3                       | down | 2.9600792 | 0.000477186 | 0.012870073 |
| 385 | Trex1     | three prime repair exonuclease 1                                       | down | 3.1594151 | 0.000827889 | 0.015931846 |
| 386 | Trhr      | thyrotropin releasing hormone receptor                                 | down | 3.8746623 | 0.000813862 | 0.015794361 |
| 387 | Tril      | TLR4 interactor with leucine-rich repeats                              | down | 2.4704941 | 2.51208E-05 | 0.005140955 |
| 388 | Tspan12   | tetraspanin 12                                                         | down | 6.6039438 | 0.000654478 | 0.014435531 |
| 389 | Tspan17   | tetraspanin 17                                                         | down | 3.4101856 | 0.000821602 | 0.015845565 |
| 390 | Tspan2    | tetraspanin 2                                                          | down | 2.3741367 | 0.000346075 | 0.011457033 |
| 391 | Tspyl4    | TSPY-like 4                                                            | down | 3.6236474 | 0.000622574 | 0.014139364 |
| 392 | Ttc23     | tetratricopeptide repeat domain 23                                     | down | 2.031059  | 0.000976642 | 0.017121066 |
| 393 | Tuba1c    | tubulin, alpha 1C                                                      | down | 2.3785662 | 0.000108109 | 0.007404739 |
| 394 | Ube2e2    | ubiquitin-conjugating enzyme E2E 2                                     | down | 2.413441  | 0.00068969  | 0.014807062 |
| 395 | Ube2v2    | ubiquitin-conjugating enzyme E2 variant 2                              | down | 2.2578665 | 0.000760273 | 0.015454568 |
| 396 | Ucma      | upper zone of growth plate and cartilage matrix associated             | down | 3.2666891 | 0.000546269 | 0.013361708 |
| 397 | Vkorc111  | vitamin K epoxide reductase complex, subunit 1-like 1                  | down | 2.0487149 | 0.000810405 | 0.015760882 |
| 398 | Vsig2     | V-set and immunoglobulin domain containing 2                           | down | 2.6882446 | 0.000517154 | 0.013147662 |
| 399 | Vsnl1     | visinin-like 1                                                         | down | 5.0782438 | 0.000958761 | 0.017007828 |

---

|     |         |                                                       |      |           |             |             |
|-----|---------|-------------------------------------------------------|------|-----------|-------------|-------------|
| 400 | Wdr44   | WD repeat domain 44                                   | down | 2.2129666 | 0.000555941 | 0.013475653 |
| 401 | Wnt2    | wingless-type MMTV integration site family member 2   | down | 4.127601  | 0.000142526 | 0.007889814 |
| 402 | Wnt5a   | wingless-type MMTV integration site family, member 5A | down | 3.3011188 | 0.000312093 | 0.011015257 |
| 403 | Yy1     | YY1 transcription factor                              | down | 2.1073888 | 0.000270835 | 0.010442987 |
| 404 | Zdhhc17 | zinc finger, DHHC-type containing 17                  | down | 2.5811649 | 2.95433E-05 | 0.005372829 |
| 405 | Zdhhc3  | zinc finger, DHHC-type containing 3                   | down | 2.0524669 | 0.000606836 | 0.014056996 |
| 406 | Zfp180  | zinc finger protein 180                               | down | 2.7313888 | 0.000149031 | 0.007978581 |
| 407 | Zfp36l2 | zinc finger protein 36, C3H type-like 2               | down | 2.1735963 | 0.000663741 | 0.014511282 |
| 408 | Zfp521  | zinc finger protein 521                               | down | 2.0607179 | 7.16962E-05 | 0.00670157  |
| 409 | Znrf2   | zinc and ring finger 2                                | down | 2.1162948 | 0.000112318 | 0.00746415  |
| 410 | Zwint   | ZW10 interacting kinetochore protein                  | down | 2.1723317 | 1.18392E-05 | 0.00466337  |
| 411 | Zzef1   | zinc finger, ZZ-type with EF hand domain 1            | down | 2.0480021 | 7.17666E-05 | 0.00670157  |

---
